# Supplementary material
Source: publisher figshare collection journal article supplement (https://frontiersin.figshare.com/ndownloader/files/34960614)
Supplement: Supplementary file [file 34960614]

**Supplemental Figure S1. Differences in the discriminative capabilities of subgraphs between the uncertain network and the certain network.**

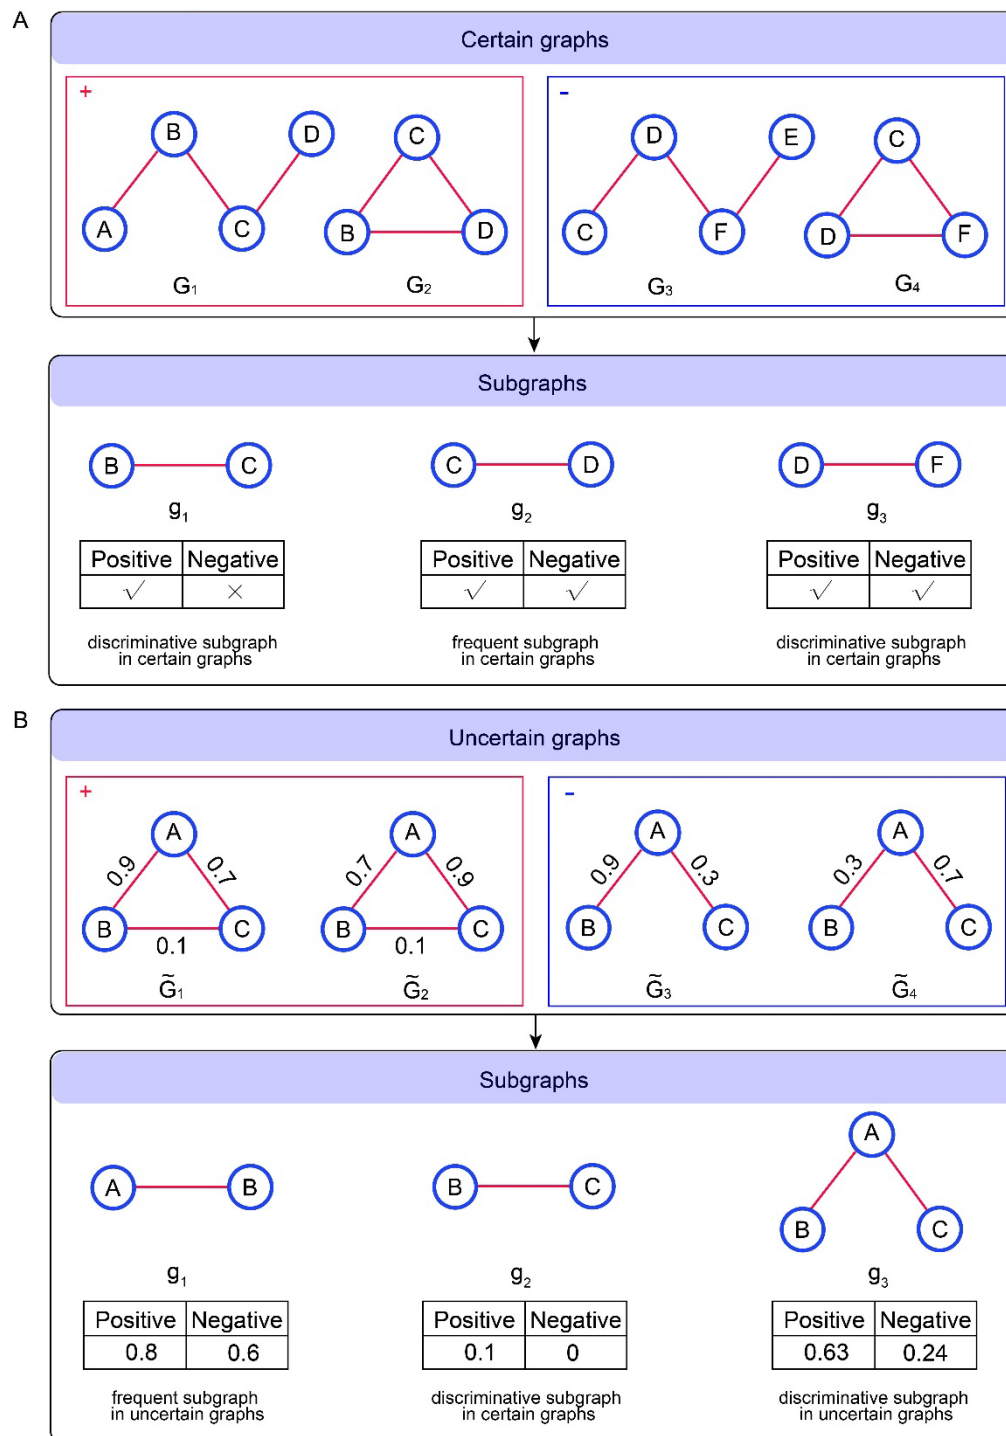

**Fig. 1. Differences in the discriminative capabilities of subgraphs between the uncertain network and the certain network.** Fig. 1A shows a certain graph dataset including four certain graphs  $G_1, \dots, G_4$  with their class labels, + or -. '+' representing positive samples; '-' represents negative samples. A, B, ..., F refer to nodes in the graph. Subgraph  $g_1$  only occurs in positive samples and does not occur in negative samples.

Subgraph  $g_2$  occurs in both positive samples and negative samples. Subgraph  $g_3$  only occurs in negative samples and does not occur in positive samples. Subgraph  $g_1$  and  $g_3$  than  $g_2$  is more suitable as a discriminative subgraph in certain graphs to perform classification. Fig. 3B shows an uncertain graph dataset including four uncertain graphs  $\tilde{G}_1, \dots, \tilde{G}_4$  with their class labels, + or -. '+' representing positive samples; '-' represents negative samples. It is assumed that the *minsup* in frequent subgraph mining is 0.2. On this basis, subgraph  $g_1$  is a frequent subgraph among the uncertain graphs but may not be related to the class labels of the graphs (the expected support degree for positive samples = 0.8; for negative samples, this is 0.6). Subgraph  $g_2$  is a discriminative subgraph if we neglect the edge uncertainties. However, when such uncertainties are considered, we find that  $g_2$  is rarely observed in the uncertain graph data set. Furthermore, this cannot be considered as a frequent subgraph in uncertain graphs (positive samples: 0.1; negative samples: 0). Subgraph  $g_3$  is a frequent subgraph among uncertain graphs and is related to the class labels of the graphs (positive samples: 0.63; negative samples: 0.24). Thus, this not only represents a frequent graph, it also represents a discriminative subgraph for uncertain graphs.
